# Supplementary material for: Qipengyuania pacifica sp. nov., a Novel Carotenoid-Producing Marine Bacterium of the Family Erythrobacteraceae, Isolated from Sponge (Demospongiae), and Antimicrobial Potential of Its Crude Extract
Source: MDPI journal article supplement (doi:10.3390/d14040295), 2022-04-14
Supplement: s1 [file s1]

**Table S1.** Physiological and biochemical characteristics of NZ-96<sup>T</sup> and reference strains on API ZYM strip system.

| S.No | Enzymes                            | NZ-96 <sup>T</sup> | <i>Qipengyuania pelagi</i> strain UST081027-248 <sup>T</sup> | <i>Qipengyuania citreus</i> strain RE35F/1 <sup>T</sup> | <i>Erythrobacter aureus</i> strain YH-07 <sup>T</sup> |
|------|------------------------------------|--------------------|--------------------------------------------------------------|---------------------------------------------------------|-------------------------------------------------------|
| 1.   | Alkaline phosphatase               | +                  | +                                                            | +                                                       | +                                                     |
| 2.   | Esterase (C 4)                     | w+                 | w+                                                           | +                                                       | +                                                     |
| 3.   | Esterase lipase (C 8)              | w+                 | +                                                            | +                                                       | +                                                     |
| 4.   | Lipase (C 14)                      | w+                 | w+                                                           | w+                                                      | w+                                                    |
| 5.   | Leucine arylamidase                | +                  | +                                                            | +                                                       | +                                                     |
| 6.   | Valine arylamidase                 | +                  | +                                                            | +                                                       | +                                                     |
| 7.   | Cystine arylamidase                | +                  | w+                                                           | w+                                                      | w+                                                    |
| 8.   | Trypsin                            | +                  | w+                                                           | +                                                       | +                                                     |
| 9.   | $\alpha$ -chymotrypsin             | w+                 | +                                                            | -                                                       | +                                                     |
| 10.  | Acid phosphatase                   | +                  | +                                                            | +                                                       | +                                                     |
| 11.  | Naphthol-AS-BI-phosphohydrolase    | +                  | w+                                                           | +                                                       | +                                                     |
| 12.  | $\alpha$ -galactosidase            | -                  | -                                                            | -                                                       | -                                                     |
| 13.  | $\beta$ -galactosidase             | -                  | -                                                            | -                                                       | -                                                     |
| 14.  | $\beta$ -glucuronidase             | -                  | -                                                            | -                                                       | -                                                     |
| 15.  | $\alpha$ -glucosidase              | +                  | +                                                            | -                                                       | -                                                     |
| 16.  | $\beta$ -glucosidase               | -                  | -                                                            | -                                                       | -                                                     |
| 17.  | N-acetyl- $\beta$ -glucosaminidase | -                  | -                                                            | -                                                       | -                                                     |
| 18.  | $\alpha$ -mannosidase              | -                  | -                                                            | -                                                       | -                                                     |
| 19.  | $\alpha$ -fucosidase               | -                  | -                                                            | -                                                       | -                                                     |

Note: + Positive; - Negative; w+ weakly positive. NZ-96<sup>T</sup> was positive for alkaline phosphatase, leucine arylamidase, valine arylamidase, cystine arylamidase, trypsin, acid phosphatase, naphthol-AS-BI-phosphohydrolase and  $\alpha$ -glucosidase whereas negative for  $\beta$ -glucosidase, N-acetyl- $\beta$ -glucosaminidase,  $\alpha$ -mannosidase,  $\alpha$ -fucosidase,  $\alpha$ -galactosidase,  $\beta$ -galactosidase and  $\beta$ -glucuronidase and displayed weak growth for Esterase (C 4), Esterase lipase (C 8) and Lipase (C 14).

**Table S2.** Physiological and biochemical characteristics of NZ-96<sup>T</sup> and reference strains on API 20E strip system.

| S.No | Enzymes                              | NZ-96 <sup>T</sup> | <i>Qipengyuania pelagi</i> strain UST081027-248 <sup>T</sup> | <i>Qipengyuania citreus</i> strain RE35F/1 <sup>T</sup> | <i>Erythrobacter aureus</i> strain YH-07 <sup>T</sup> |
|------|--------------------------------------|--------------------|--------------------------------------------------------------|---------------------------------------------------------|-------------------------------------------------------|
| 1.   | $\beta$ -galactosidase (ONPG)        | -                  | -                                                            | -                                                       | -                                                     |
| 2.   | Arginine dihydrolase                 | +                  | +                                                            | +                                                       | +                                                     |
| 3.   | Lysine decarboxylase                 | w+                 | -                                                            | -                                                       | -                                                     |
| 4.   | ornithine decarboxylase              | -                  | -                                                            | -                                                       | -                                                     |
| 5.   | Citrate utilization                  | w+                 | -                                                            | -                                                       | -                                                     |
| 6.   | Hydrogen sulfide production          | -                  | -                                                            | -                                                       | -                                                     |
| 7.   | Urease                               | -                  | -                                                            | -                                                       | -                                                     |
| 8.   | Tryptophan deaminase                 | w+                 | +                                                            | +                                                       | +                                                     |
| 9.   | Indole production                    | -                  | -                                                            | -                                                       | -                                                     |
| 10.  | Voges proskauer (acetoin production) | -                  | -                                                            | -                                                       | -                                                     |
| 11.  | Gelatinase                           | -                  | w+                                                           | -                                                       | -                                                     |

|     |                         |   |   |   |   |
|-----|-------------------------|---|---|---|---|
| 12. | Glucose fermentation    | - | - | - | - |
| 13. | Mannitol fermentation   | - | - | - | - |
| 14. | Inositol fermentation   | + | - | - | - |
| 15. | Sorbitol fermentation   | - | - | - | - |
| 16. | Rhamnose fermentation   | + | - | - | - |
| 17. | Saccharose fermentation | - | - | - | - |
| 18. | Melibiose fermentation  | - | - | - | - |
| 19. | Amygdalin fermentation  | - | - | - | - |
| 20. | Arabinose fermentation  | - | - | - | - |

Note: + Positive; - Negative; w+ weakly positive. NZ-96T was positive for arginine dihydrolase, inositol fermentation and rhamnose fermentation whereas negative for Glucose fermentation, mannitol fermentation, sorbitol fermentation, saccharose fermentation, melibiose fermentation, amygdalin fermentation, arabinose fermentation and displayed weak growth for tryptophan deaminase, citrate utilization and lysine decarboxylase.

**Table S3.** Physiological and biochemical characteristics of NZ-96<sup>T</sup> and reference strains on API 20NE strip system.

| S.No | Enzymes                            | NZ-96 <sup>T</sup> | <i>Qipengyuania pelagi</i> strain UST081027-248 <sup>T</sup> | <i>Qipengyuania citreus</i> strain RE35F/1 <sup>T</sup> | <i>Erythrobacter aureus</i> strain YH-07 <sup>T</sup> |
|------|------------------------------------|--------------------|--------------------------------------------------------------|---------------------------------------------------------|-------------------------------------------------------|
| 1.   | Nitrate reduction                  | -                  | +                                                            | +                                                       | +                                                     |
| 2.   | Indole production                  | -                  | -                                                            | -                                                       | -                                                     |
| 3.   | Glucose fermentation               | -                  | -                                                            | -                                                       | -                                                     |
| 4.   | Arginine Dihydrolase               | +                  | -                                                            | -                                                       | -                                                     |
| 5.   | Urease                             | -                  | -                                                            | -                                                       | -                                                     |
| 6.   | Esculin hydrolysis                 | +                  | +                                                            | +                                                       | +                                                     |
| 7.   | Gelatin hydrolysis                 | -                  | -                                                            | -                                                       | -                                                     |
| 8.   | β-galactosidase (PNPG)             | -                  | -                                                            | -                                                       | -                                                     |
| 9.   | Glucose assimilation               | -                  | -                                                            | -                                                       | -                                                     |
| 10.  | Arabinose assimilation             | -                  | -                                                            | -                                                       | -                                                     |
| 11.  | Mannose assimilation               | -                  | -                                                            | -                                                       | -                                                     |
| 12.  | Mannitol assimilation              | -                  | -                                                            | -                                                       | -                                                     |
| 13.  | N-acetyl- Glucosamine assimilation | -                  | -                                                            | -                                                       | -                                                     |
| 14.  | Maltose assimilation               | -                  | -                                                            | +                                                       | -                                                     |
| 15.  | Potassium gluconate assimilation   | -                  | -                                                            | -                                                       | -                                                     |
| 16.  | Capric acid assimilation           | -                  | -                                                            | -                                                       | -                                                     |
| 17.  | Adipic acid assimilation           | -                  | -                                                            | -                                                       | -                                                     |
| 18.  | Malate assimilation                | -                  | -                                                            | -                                                       | +                                                     |
| 19.  | Trisodium citrate assimilation     | -                  | -                                                            | -                                                       | -                                                     |
| 20.  | Phenylacetic acid assimilation     | -                  | -                                                            | -                                                       | W+                                                    |

Note: + Positive; - Negative; w+ weakly positive. NZ-96T was positive for esculin hydrolysis and arginine dihydrolase whereas negative for mannose assimilation, mannitol assimilation, N-acetyl-Glucosamine assimilation, maltose assimilation and potassium gluconate assimilation and remaining substrates in the API 20NE strip system.

**Table S4.** Physiological and biochemical characteristics of NZ-96<sup>T</sup> on Biolog Gen III Microplate.

| A1                          | Dextrin             | D-Maltose                  | D-Trehalose                 | D-cellobiose      | Gentiobiose                  | Sucrose                          | D-Turanose               | stachyose                | 1% sodium lactate  | Niaproof 4 |
|-----------------------------|---------------------|----------------------------|-----------------------------|-------------------|------------------------------|----------------------------------|--------------------------|--------------------------|--------------------|------------|
|                             | +                   | -                          | +                           | +                 | +                            | +                                | +                        | -                        | +                  | -          |
| D-Raffinose                 | $\alpha$ -D-lactose | D-Melibiose                | $\beta$ -Methyl-D-Glucoside | D-Salicin         | N-Acetyl-D-Glucoasamine -    | N-Acetyl- $\beta$ -D-Mannosamine | N-Acetyl-D-Galactosamine | N-Acetyl Neuraminic acid | Guanidine HCL      | -          |
| +                           | +                   | -                          | +                           | +                 | +                            | +                                | +                        | +                        | -                  |            |
| $\alpha$ -D-Glucose         | D-Mannose           | D-Fructose                 | D-Galactose                 | 3-Methyl Glucose  | D-Fucose                     | L-Fucose                         | L-Rhamnose               | Inosine                  | Nalidixic acid     |            |
| -                           | -                   | +                          | +                           | +                 | +                            | +                                | +                        | -                        | +                  |            |
| D-Sorbitol                  | D-Mannitol          | D-Arabitol                 | myo-Inositol                | Glycerol          | D-Glucose-6-PO4              | D-Fructose-6-PO4                 | D-Aspartic acid          | D-Serine                 | Tetrazolium violet |            |
| -                           | -                   | +                          | +                           | +                 | +                            | +                                | -                        | -                        | -                  |            |
| Gelatin                     | Glycyl-L-Proline    | L-Alanine                  | L-Arginine                  | L-Aspartic acid   | L-Glutamic acid              | L-Histidine                      | L-Pyroglutamic acid      | L-Serine                 | Lithium Chloride   |            |
| -                           | +                   | -                          | +                           | +                 | +                            | -                                | +                        | +                        | +                  |            |
| Pectin                      | D-Galacturonic acid | L-Galactonic Acid lactone  | D-Gluconic acid             | D-Glucuronic acid | Glucuronamide                | Mucic acid                       | Quinic acid              | D-Saccharic acid         | Sodium butyrate    |            |
| +                           | +                   | +                          | +                           | +                 | +                            | +                                | +                        | +                        | -                  |            |
| p-Hydroxy-phenylacetic acid | Methyl Pyruvate     | D-Lactic acid Methyl ester | L-Lactic acid               | Citric acid       | $\alpha$ -keto-Glutaric acid | D-Malic acid                     | L-Malic acid             | Bromo-succinic acid      | Tetrazolium Blue   |            |
| -                           | -                   | +                          | +                           | -                 | +                            | +                                | +                        | -                        | -                  |            |

---

|          |                  |                    |                   |                        |             |                |             |             |           |
|----------|------------------|--------------------|-------------------|------------------------|-------------|----------------|-------------|-------------|-----------|
| Tween 40 | $\gamma$ -Amino- | $\alpha$ -hydroxy- | $\beta$ -hydroxy- | $\alpha$ -keto-Butyric | Acetoacetic | Propionic acid | Acetic acid | Formic acid | Potassium |
| +        | Butyric Acid     | Butyric acid       | D,L-              | acid                   | acid        | +              | +           | W+          | Tellurite |
|          | –                | W+                 | Butyriacid        | –                      | +           |                |             |             | +         |
|          |                  |                    | +                 |                        |             |                |             |             |           |

---

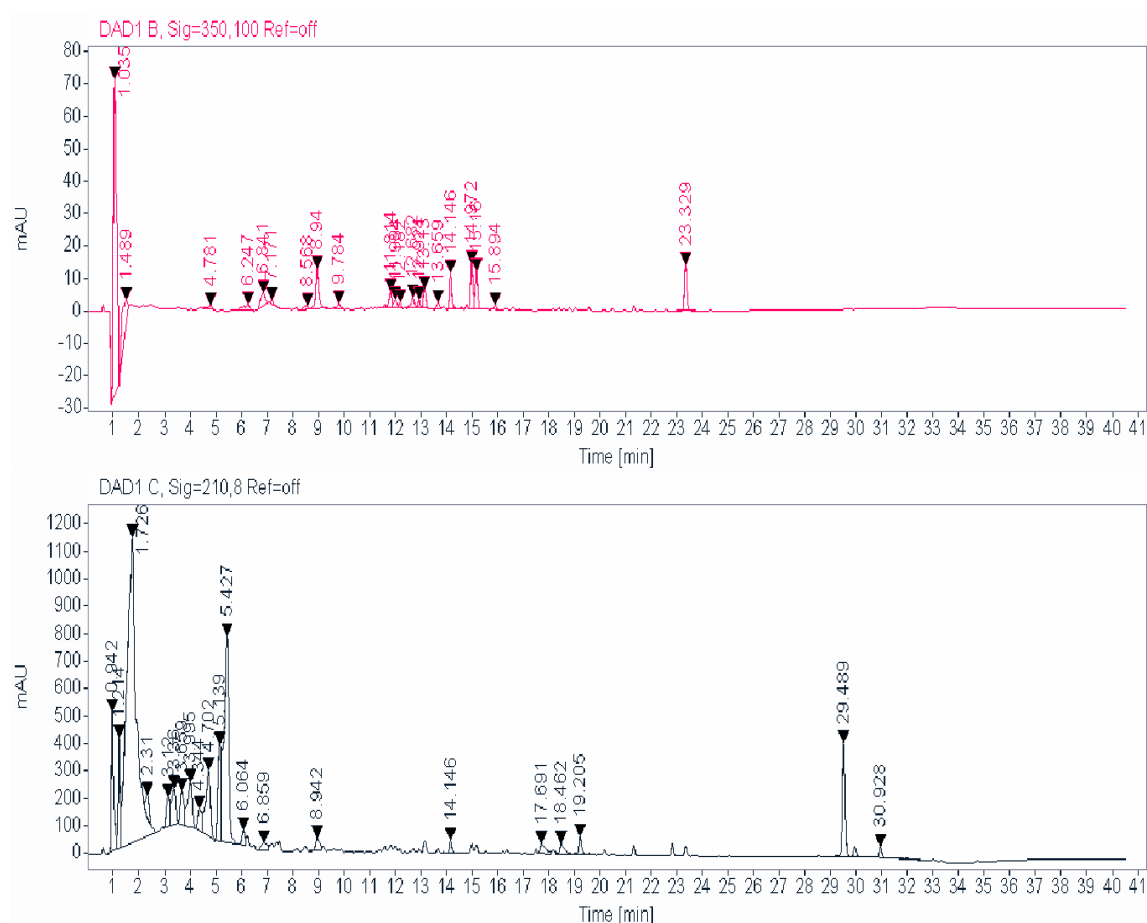

**Figure S1.** HPLC FRACTIONATION CHROMATOGRAM OF NZ-96 vs *Staphylococcus aureus* Newman.

| 1          |                           |         |         |                            |            |
|------------|---------------------------|---------|---------|----------------------------|------------|
|            | 1                         |         |         |                            |            |
| Region     | Type                      | From    | To      | Most similar known cluster | Similarity |
| Region 1.1 | betalactone               | 298,580 | 326,894 |                            |            |
| 6          |                           |         |         |                            |            |
|            | 1                         |         |         |                            |            |
| Region     | Type                      | From    | To      | Most similar known cluster | Similarity |
| Region 6.1 | terpene                   | 112,027 | 136,358 | zeaxanthin                 | 66%        |
| 8          |                           |         |         |                            |            |
|            | 1                         |         |         |                            |            |
| Region     | Type                      | From    | To      | Most similar known cluster | Similarity |
| Region 8.1 | lassopeptide, hserlactone | 35,697  | 73,244  |                            |            |

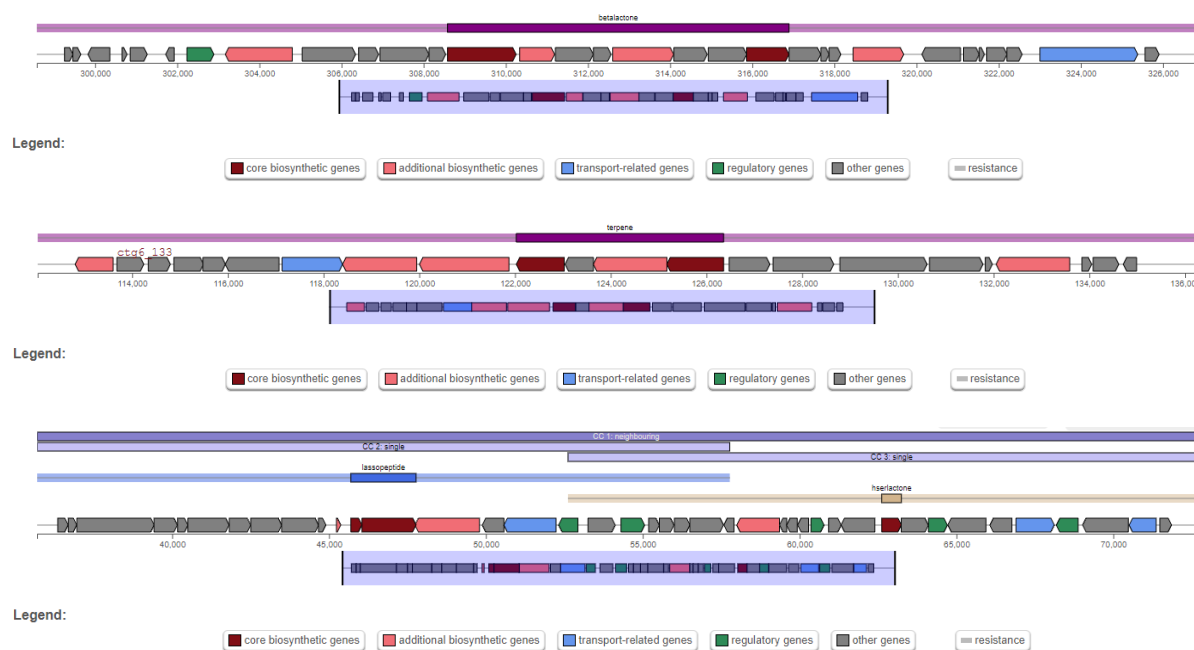

**Figure S2.** Predicted secondary metabolite gene clusters for strain NZ-96<sup>T</sup> identified by analysis of the NZ-96<sup>T</sup> genome sequence with the bioinformatic tool antiSMASH 5.0.

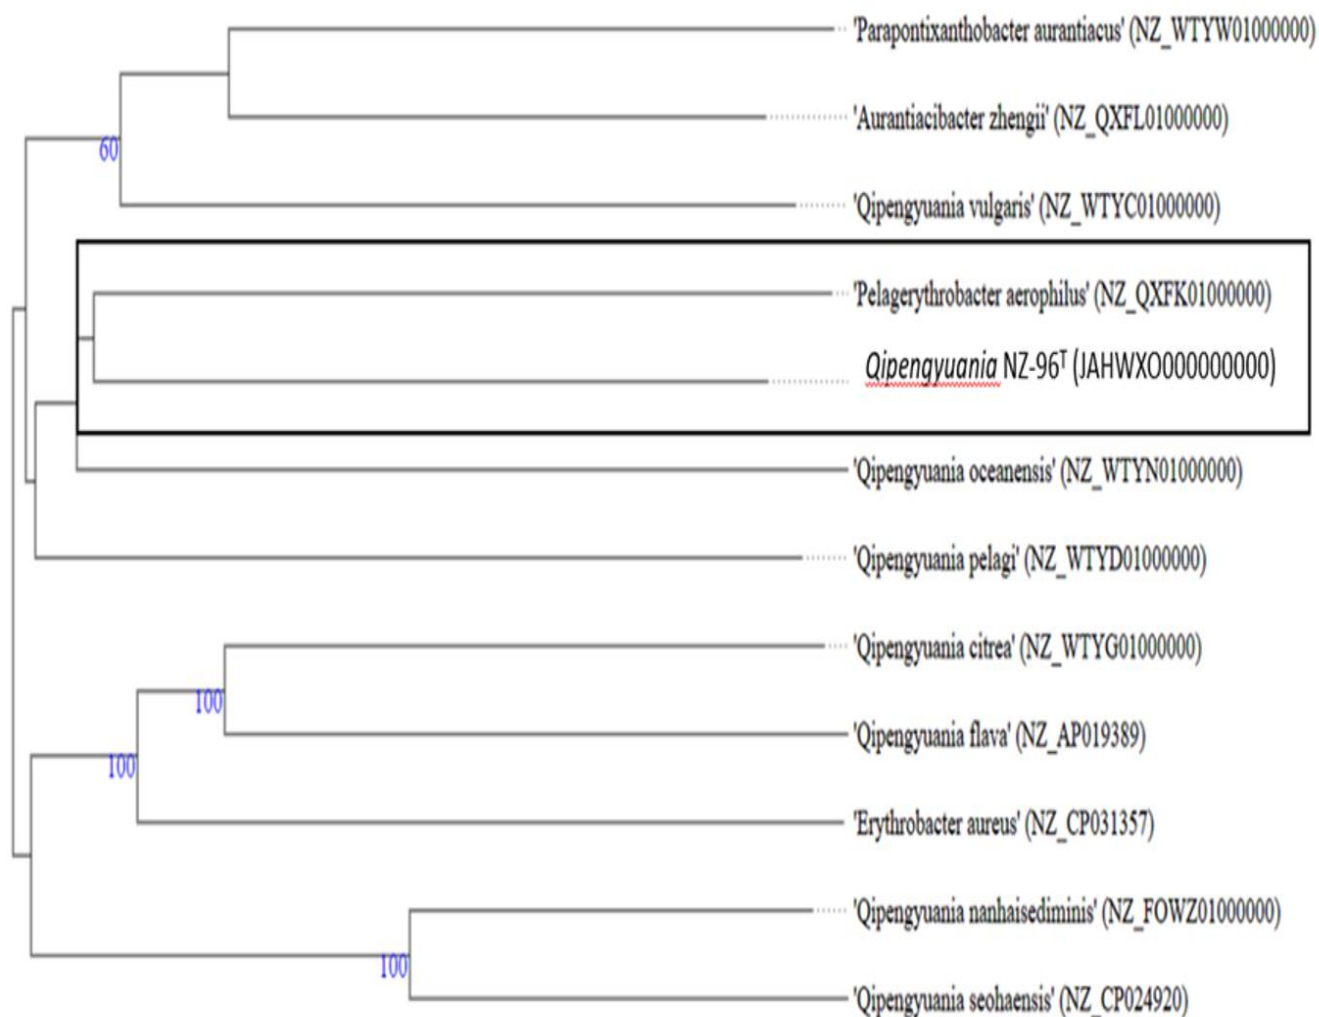

**Figure S3.** Tree inferred with FastME 2.1.6.1 from GBDP distances calculated from genome sequences. The branch lengths are scaled in terms of GBDP distance formula d5. The numbers above branches are GBDP pseudo-bootstrap support values > 60 % from 100 replications, with an average branch support of 61.8 %.
